# Supplementary material
Source: PubMed Central journal article supplement (PMC6792370)
Supplement: ehp-127-067005-s001.pdf [file ehp-127-067005-s001.pdf]

**Note to readers with disabilities:** *EHP* strives to ensure that all journal content is accessible to all readers. However, some figures and Supplemental Material published in *EHP* articles may not conform to [508 standards](#) due to the complexity of the information being presented. If you need assistance accessing journal content, please contact [ehp508@niehs.nih.gov](mailto:ehp508@niehs.nih.gov). Our staff will work with you to assess and meet your accessibility needs within 3 working days.

### **Supplemental Material**

#### **Ambient Temperature and Markers of Fetal Growth: A Retrospective Observational Study of 29 Million U.S. Singleton Births**

Shengzhi Sun, Keith R. Spangler, Kate R. Weinberger, Jeff D. Yanosky, Joseph M. Braun, and Gregory A. Wellenius

#### **Table of Contents**

**Table S1.** Summary statistics of average temperature during the entire pregnancy by county.

**Table S2.** Summary statistics of average temperature during the entire pregnancy, overall and by geographic region and climate zone.

**Table S3.** Pearson correlation between overall and trimester-specific temperature and fine particulate matter.

**Figure S1.** Location of the 403 US counties, 6 National Climate Assessment geographic regions, and 7 US Building America climate zones.

**Figure S2.** Flow diagram of birth exclusion in this study.

**Figure S3.** An illustration of how the gridded PRISM data intersect with census tracts in Providence county, RI.

**Figure S4. Exposure-response curves for the associations between average temperatures during the entire pregnancy and small for gestational age (A) and birth weight z-score (B) among 31,921,046 births with gestational age ranging from 22 to 44 weeks in 403 US counties between 1989 and 2002.** Models were adjusted for maternal age, race, marital status, years of education, smoking or drinking during pregnancy, parity, chronic hypertension, and year and month of conception.

**Supplemental Material, Table S1.** Summary statistics of average temperature during the entire pregnancy by county.

| County FIPS Codes | Temperature Percentile |                  |                  |                  |                  |                  |                  |         |
|-------------------|------------------------|------------------|------------------|------------------|------------------|------------------|------------------|---------|
|                   | Minimum                | 10 <sup>th</sup> | 20 <sup>th</sup> | 40 <sup>th</sup> | 50 <sup>th</sup> | 80 <sup>th</sup> | 90 <sup>th</sup> | Maximum |
| 01015             | 52.2                   | 55.6             | 56.8             | 59.4             | 61.0             | 65.0             | 66.3             | 69.6    |
| 01073             | 53.3                   | 57.2             | 58.3             | 60.9             | 62.5             | 66.5             | 67.7             | 71.3    |
| 01089             | 50.4                   | 53.9             | 55.2             | 58.0             | 59.7             | 64.0             | 65.4             | 69.1    |
| 01097             | 59.3                   | 62.0             | 63.0             | 65.3             | 66.6             | 70.2             | 71.2             | 74.5    |
| 01101             | 56.9                   | 60.0             | 61.1             | 63.5             | 65.0             | 68.9             | 70.1             | 73.7    |
| 01125             | 54.6                   | 58.0             | 59.1             | 61.6             | 63.2             | 67.3             | 68.5             | 71.6    |
| 04013             | 62.8                   | 66.7             | 68.1             | 71.0             | 72.7             | 76.8             | 78.2             | 81.5    |
| 04019             | 60.5                   | 63.6             | 64.9             | 67.5             | 69.1             | 73.1             | 74.3             | 77.1    |
| 05119             | 53.1                   | 56.1             | 57.5             | 60.3             | 62.1             | 66.8             | 68.1             | 72.8    |
| 05143             | 48.6                   | 51.5             | 52.9             | 55.7             | 57.5             | 62.2             | 63.6             | 67.7    |
| 06001             | 53.6                   | 56.5             | 57.2             | 58.6             | 59.2             | 61.2             | 62.2             | 64.9    |
| 06007             | 53.6                   | 56.6             | 57.8             | 59.9             | 61.3             | 64.7             | 65.6             | 68.9    |
| 06013             | 53.6                   | 56.5             | 57.3             | 58.9             | 59.8             | 62.4             | 63.4             | 66.4    |
| 06019             | 54.8                   | 58.6             | 59.9             | 62.3             | 63.7             | 67.5             | 68.6             | 72.0    |
| 06023             | 49.3                   | 51.4             | 52.0             | 53.3             | 53.9             | 55.4             | 56.0             | 58.4    |
| 06029             | 54.9                   | 59.0             | 60.3             | 62.8             | 64.2             | 68.0             | 69.1             | 72.4    |
| 06037             | 59.4                   | 62.0             | 63.0             | 64.5             | 65.2             | 67.2             | 68.0             | 70.6    |
| 06041             | 52.8                   | 55.6             | 56.1             | 57.6             | 58.2             | 60.2             | 61.0             | 63.4    |
| 06047             | 53.8                   | 57.6             | 58.8             | 61.0             | 62.4             | 65.9             | 67.1             | 70.4    |
| 06053             | 52.4                   | 55.2             | 55.9             | 57.0             | 57.5             | 58.9             | 59.9             | 62.0    |
| 06059             | 59.4                   | 61.8             | 62.8             | 64.1             | 64.8             | 66.6             | 67.5             | 70.0    |
| 06061             | 52.4                   | 55.8             | 57.0             | 59.2             | 60.6             | 63.9             | 64.9             | 68.3    |
| 06065             | 59.4                   | 62.3             | 63.5             | 65.6             | 66.8             | 69.5             | 70.4             | 73.0    |
| 06067             | 54.3                   | 57.5             | 58.6             | 60.8             | 62.1             | 65.4             | 66.4             | 69.7    |
| 06071             | 56.9                   | 59.7             | 60.9             | 63.0             | 64.1             | 66.8             | 67.6             | 70.5    |
| 06073             | 57.4                   | 60.6             | 61.4             | 62.9             | 63.6             | 65.4             | 66.2             | 69.2    |
| 06075             | 53.1                   | 55.9             | 56.4             | 57.5             | 57.9             | 59.2             | 60.2             | 62.5    |
| 06077             | 54.2                   | 57.3             | 58.4             | 60.5             | 61.7             | 65.1             | 66.2             | 69.3    |
| 06079             | 52.9                   | 55.9             | 56.7             | 57.9             | 58.5             | 60.2             | 61.0             | 63.5    |
| 06081             | 53.0                   | 55.6             | 56.2             | 57.4             | 57.9             | 59.5             | 60.4             | 62.7    |
| 06083             | 54.9                   | 57.3             | 58.1             | 59.2             | 59.8             | 61.2             | 62.0             | 64.3    |
| 06085             | 53.6                   | 57.0             | 57.7             | 59.2             | 60.0             | 62.3             | 63.3             | 65.9    |
| 06087             | 51.8                   | 54.5             | 55.1             | 56.1             | 56.5             | 58.4             | 59.2             | 61.4    |
| 06089             | 53.1                   | 56.5             | 57.8             | 60.4             | 61.9             | 65.5             | 66.5             | 70.0    |
| 06095             | 53.8                   | 56.6             | 57.5             | 59.4             | 60.4             | 63.3             | 64.4             | 67.3    |
| 06097             | 52.1                   | 54.9             | 55.6             | 57.1             | 57.9             | 60.2             | 61.1             | 63.5    |
| 06099             | 54.2                   | 58.1             | 59.1             | 61.3             | 62.6             | 66.1             | 67.2             | 70.4    |
| 06107             | 54.7                   | 58.6             | 59.8             | 62.1             | 63.5             | 67.1             | 68.2             | 71.3    |
| 06111             | 56.8                   | 59.0             | 60.0             | 61.3             | 61.9             | 63.5             | 64.3             | 66.6    |
| 06113             | 54.5                   | 57.5             | 58.5             | 60.5             | 61.8             | 65.2             | 66.2             | 69.5    |
| 08001             | 41.9                   | 44.5             | 45.8             | 49.0             | 50.9             | 55.5             | 56.6             | 60.1    |
| 08005             | 41.6                   | 44.1             | 45.3             | 48.5             | 50.4             | 54.9             | 56.1             | 59.5    |

|       |      |      |      |      |      |      |      |      |
|-------|------|------|------|------|------|------|------|------|
| 08013 | 41.3 | 43.6 | 44.9 | 48.0 | 49.9 | 54.6 | 55.7 | 59.2 |
| 08031 | 42.2 | 44.8 | 46.2 | 49.4 | 51.3 | 55.8 | 57.0 | 60.5 |
| 08041 | 39.5 | 41.9 | 43.1 | 46.1 | 47.9 | 52.2 | 53.4 | 56.8 |
| 08059 | 41.2 | 43.7 | 45.0 | 48.0 | 49.8 | 54.2 | 55.4 | 58.8 |
| 08069 | 39.9 | 42.6 | 43.9 | 46.9 | 48.8 | 53.4 | 54.6 | 57.8 |
| 08101 | 43.5 | 46.0 | 47.3 | 50.6 | 52.6 | 57.5 | 58.6 | 61.9 |
| 08123 | 39.9 | 42.8 | 44.1 | 47.4 | 49.4 | 54.4 | 55.6 | 59.0 |
| 09001 | 40.6 | 44.8 | 46.3 | 49.2 | 51.0 | 56.0 | 57.4 | 60.3 |
| 09003 | 38.9 | 43.2 | 44.9 | 47.9 | 49.7 | 54.9 | 56.5 | 60.0 |
| 09005 | 36.9 | 41.0 | 42.6 | 45.5 | 47.4 | 52.6 | 54.2 | 57.5 |
| 09007 | 39.0 | 43.3 | 44.9 | 47.9 | 49.7 | 54.5 | 56.2 | 59.6 |
| 09009 | 39.8 | 43.9 | 45.6 | 48.5 | 50.3 | 55.3 | 56.8 | 59.9 |
| 09011 | 40.3 | 44.0 | 45.5 | 48.4 | 50.2 | 54.8 | 56.3 | 59.3 |
| 09013 | 38.0 | 41.8 | 43.4 | 46.3 | 48.1 | 53.2 | 54.8 | 58.1 |
| 10003 | 45.1 | 48.1 | 49.5 | 52.6 | 54.4 | 59.3 | 60.8 | 63.4 |
| 11001 | 47.0 | 50.3 | 51.9 | 54.9 | 56.8 | 61.4 | 62.9 | 66.3 |
| 12001 | 62.9 | 65.3 | 66.2 | 68.0 | 69.1 | 72.0 | 73.1 | 76.2 |
| 12009 | 68.1 | 69.9 | 70.6 | 71.9 | 72.7 | 75.1 | 75.8 | 78.4 |
| 12011 | 71.0 | 74.1 | 74.8 | 75.9 | 76.4 | 78.3 | 78.8 | 81.0 |
| 12025 | 72.3 | 74.4 | 75.0 | 76.0 | 76.6 | 78.4 | 78.9 | 81.1 |
| 12031 | 62.9 | 65.6 | 66.5 | 68.4 | 69.5 | 72.6 | 73.6 | 77.1 |
| 12033 | 60.3 | 63.2 | 64.3 | 66.4 | 67.7 | 71.1 | 72.2 | 75.5 |
| 12057 | 67.6 | 69.6 | 70.4 | 71.9 | 72.7 | 75.4 | 76.2 | 78.2 |
| 12069 | 65.7 | 67.8 | 68.8 | 70.4 | 71.3 | 74.1 | 75.1 | 77.6 |
| 12071 | 69.8 | 72.1 | 72.8 | 73.8 | 74.6 | 76.7 | 77.5 | 79.2 |
| 12073 | 60.3 | 63.1 | 64.1 | 66.0 | 67.1 | 70.5 | 71.6 | 74.4 |
| 12081 | 68.1 | 70.3 | 71.1 | 72.4 | 73.2 | 75.7 | 76.5 | 78.8 |
| 12083 | 64.3 | 66.5 | 67.5 | 69.1 | 70.1 | 73.0 | 74.0 | 76.6 |
| 12091 | 59.2 | 62.2 | 63.3 | 65.5 | 66.8 | 70.3 | 71.4 | 74.9 |
| 12095 | 67.4 | 69.4 | 70.2 | 71.7 | 72.6 | 75.2 | 76.1 | 78.5 |
| 12099 | 70.0 | 72.7 | 73.5 | 74.6 | 75.2 | 77.1 | 77.7 | 79.7 |
| 12101 | 66.5 | 68.8 | 69.6 | 71.1 | 72.0 | 74.7 | 75.6 | 77.7 |
| 12103 | 68.1 | 70.3 | 71.1 | 72.5 | 73.4 | 76.0 | 76.8 | 78.9 |
| 12105 | 68.0 | 69.9 | 70.7 | 72.1 | 73.0 | 75.5 | 76.3 | 78.4 |
| 12115 | 68.3 | 70.4 | 71.3 | 72.6 | 73.4 | 75.8 | 76.6 | 78.7 |
| 12117 | 67.1 | 69.0 | 69.8 | 71.3 | 72.2 | 74.8 | 75.7 | 78.3 |
| 12127 | 66.2 | 68.0 | 68.9 | 70.4 | 71.3 | 73.9 | 74.8 | 77.5 |
| 13021 | 55.6 | 58.7 | 59.9 | 62.4 | 63.9 | 67.9 | 69.0 | 72.2 |
| 13051 | 59.2 | 61.9 | 63.0 | 65.3 | 66.6 | 70.3 | 71.3 | 74.3 |
| 13063 | 52.8 | 56.1 | 57.4 | 59.9 | 61.5 | 65.8 | 66.9 | 70.2 |
| 13067 | 51.5 | 55.1 | 56.3 | 58.9 | 60.4 | 64.5 | 65.8 | 69.4 |
| 13089 | 52.1 | 55.7 | 57.0 | 59.6 | 61.1 | 65.3 | 66.5 | 70.1 |
| 13121 | 52.1 | 55.6 | 56.9 | 59.5 | 61.0 | 65.2 | 66.4 | 69.8 |
| 13135 | 51.9 | 55.5 | 56.8 | 59.3 | 60.9 | 65.0 | 66.2 | 69.8 |
| 13215 | 56.3 | 59.5 | 60.7 | 63.2 | 64.6 | 68.5 | 69.8 | 73.1 |
| 13245 | 55.3 | 58.5 | 59.7 | 62.2 | 63.7 | 67.6 | 68.8 | 72.2 |
| 16001 | 40.3 | 44.7 | 46.0 | 49.0 | 50.7 | 55.5 | 56.8 | 60.0 |
| 17019 | 40.1 | 44.3 | 46.1 | 48.9 | 50.9 | 56.7 | 58.4 | 62.7 |

|       |      |      |      |      |      |      |      |      |
|-------|------|------|------|------|------|------|------|------|
| 17031 | 38.8 | 43.4 | 45.2 | 48.4 | 50.4 | 55.9 | 57.7 | 62.3 |
| 17043 | 37.5 | 42.2 | 44.0 | 47.0 | 49.0 | 54.8 | 56.7 | 61.2 |
| 17089 | 36.6 | 41.4 | 43.3 | 46.4 | 48.4 | 54.2 | 56.1 | 60.4 |
| 17097 | 36.4 | 41.1 | 43.1 | 46.1 | 48.1 | 53.7 | 55.6 | 60.1 |
| 17099 | 38.3 | 42.7 | 44.5 | 47.4 | 49.4 | 55.4 | 57.2 | 61.6 |
| 17111 | 35.7 | 40.4 | 42.3 | 45.4 | 47.4 | 53.4 | 55.3 | 59.6 |
| 17113 | 40.0 | 44.1 | 45.9 | 48.9 | 50.9 | 56.9 | 58.7 | 62.8 |
| 17115 | 42.0 | 46.0 | 47.5 | 50.4 | 52.4 | 58.1 | 59.6 | 63.9 |
| 17119 | 44.5 | 48.6 | 50.2 | 53.2 | 55.0 | 60.5 | 62.1 | 66.2 |
| 17143 | 39.1 | 43.5 | 45.5 | 48.6 | 50.6 | 56.5 | 58.3 | 62.6 |
| 17161 | 37.9 | 42.5 | 44.3 | 47.4 | 49.5 | 55.5 | 57.2 | 61.5 |
| 17163 | 45.2 | 49.1 | 50.7 | 53.7 | 55.6 | 60.9 | 62.5 | 66.3 |
| 17167 | 41.6 | 45.6 | 47.3 | 50.3 | 52.2 | 57.9 | 59.4 | 63.4 |
| 17179 | 39.9 | 44.2 | 46.0 | 49.0 | 51.1 | 56.8 | 58.5 | 62.7 |
| 17197 | 38.4 | 43.0 | 44.8 | 47.8 | 49.8 | 55.6 | 57.5 | 61.9 |
| 17201 | 35.5 | 40.5 | 42.3 | 45.5 | 47.6 | 53.5 | 55.5 | 59.8 |
| 18003 | 38.9 | 43.3 | 45.0 | 47.9 | 49.9 | 55.4 | 57.2 | 61.2 |
| 18035 | 39.6 | 44.0 | 45.8 | 48.6 | 50.6 | 55.8 | 57.6 | 61.5 |
| 18039 | 38.5 | 42.5 | 44.2 | 47.2 | 49.1 | 54.4 | 56.0 | 60.1 |
| 18089 | 39.4 | 43.7 | 45.5 | 48.5 | 50.5 | 55.9 | 57.7 | 62.3 |
| 18091 | 39.2 | 43.1 | 44.7 | 47.6 | 49.6 | 55.1 | 56.8 | 61.0 |
| 18095 | 39.6 | 44.2 | 45.9 | 48.8 | 50.7 | 56.0 | 57.7 | 61.7 |
| 18097 | 40.9 | 45.5 | 47.2 | 50.1 | 52.0 | 57.4 | 59.1 | 62.8 |
| 18127 | 39.0 | 43.1 | 44.8 | 47.7 | 49.7 | 55.1 | 56.9 | 61.3 |
| 18141 | 38.4 | 42.6 | 44.3 | 47.1 | 49.1 | 54.5 | 56.2 | 60.5 |
| 18157 | 39.7 | 44.5 | 46.3 | 49.2 | 51.1 | 56.6 | 58.4 | 62.9 |
| 18163 | 46.0 | 49.8 | 51.4 | 54.4 | 56.2 | 61.2 | 62.8 | 66.4 |
| 18167 | 42.7 | 46.5 | 48.3 | 51.2 | 53.1 | 58.5 | 60.3 | 64.4 |
| 19013 | 34.3 | 39.0 | 41.0 | 44.5 | 46.7 | 53.1 | 54.9 | 59.4 |
| 19113 | 35.9 | 40.5 | 42.6 | 45.8 | 47.9 | 54.0 | 55.8 | 60.0 |
| 19153 | 36.8 | 41.3 | 43.5 | 46.9 | 49.0 | 55.1 | 56.9 | 61.6 |
| 19163 | 37.7 | 42.1 | 44.0 | 47.1 | 49.2 | 55.3 | 57.0 | 61.1 |
| 20091 | 44.4 | 47.8 | 49.5 | 52.6 | 54.6 | 60.1 | 61.7 | 66.0 |
| 20173 | 45.6 | 49.6 | 51.1 | 54.3 | 56.4 | 61.8 | 63.4 | 67.7 |
| 20177 | 43.8 | 47.4 | 49.1 | 52.3 | 54.3 | 59.9 | 61.6 | 66.2 |
| 20209 | 44.7 | 48.0 | 49.7 | 53.0 | 55.0 | 60.4 | 62.0 | 66.2 |
| 21067 | 45.6 | 49.4 | 50.8 | 53.6 | 55.4 | 60.1 | 61.6 | 64.7 |
| 21111 | 46.1 | 50.2 | 51.8 | 54.6 | 56.5 | 61.3 | 62.7 | 66.6 |
| 21117 | 43.6 | 47.9 | 49.4 | 52.1 | 54.0 | 59.2 | 60.7 | 64.1 |
| 22017 | 56.9 | 59.7 | 60.8 | 63.4 | 65.1 | 69.3 | 70.5 | 74.4 |
| 22019 | 61.0 | 63.4 | 64.3 | 66.6 | 67.9 | 71.7 | 72.7 | 75.9 |
| 22033 | 60.4 | 62.7 | 63.6 | 65.8 | 67.2 | 70.8 | 71.8 | 75.3 |
| 22051 | 63.1 | 65.1 | 66.1 | 68.2 | 69.4 | 73.0 | 74.0 | 76.9 |
| 22055 | 61.3 | 63.6 | 64.5 | 66.7 | 68.0 | 71.7 | 72.6 | 75.9 |
| 22071 | 63.2 | 65.3 | 66.3 | 68.5 | 69.8 | 73.2 | 74.3 | 77.3 |
| 22073 | 56.9 | 59.7 | 60.8 | 63.4 | 65.0 | 69.1 | 70.2 | 73.9 |
| 22079 | 59.0 | 61.6 | 62.7 | 65.1 | 66.6 | 70.7 | 71.7 | 75.1 |
| 22103 | 61.2 | 63.3 | 64.2 | 66.3 | 67.7 | 71.4 | 72.4 | 75.6 |

|       |      |      |      |      |      |      |      |      |
|-------|------|------|------|------|------|------|------|------|
| 23005 | 35.1 | 38.7 | 40.3 | 43.1 | 45.0 | 50.5 | 52.1 | 55.6 |
| 23011 | 33.4 | 37.2 | 39.0 | 42.0 | 44.0 | 49.9 | 51.6 | 55.8 |
| 23019 | 32.0 | 35.7 | 37.5 | 40.3 | 42.4 | 48.7 | 50.4 | 54.7 |
| 23031 | 35.7 | 39.2 | 40.8 | 43.7 | 45.6 | 51.1 | 52.6 | 55.8 |
| 24003 | 46.2 | 49.7 | 51.2 | 54.1 | 55.9 | 60.6 | 62.1 | 65.5 |
| 24005 | 45.7 | 49.2 | 50.8 | 53.7 | 55.5 | 60.3 | 61.8 | 65.4 |
| 24021 | 44.1 | 47.5 | 49.1 | 52.0 | 53.7 | 58.6 | 60.1 | 63.4 |
| 24025 | 45.3 | 48.7 | 50.3 | 53.2 | 55.0 | 59.8 | 61.3 | 64.7 |
| 24027 | 45.3 | 48.7 | 50.2 | 53.0 | 54.7 | 59.6 | 61.0 | 64.4 |
| 24031 | 45.5 | 48.9 | 50.5 | 53.3 | 55.1 | 59.8 | 61.3 | 64.5 |
| 24033 | 46.3 | 49.7 | 51.3 | 54.3 | 56.1 | 60.8 | 62.2 | 65.5 |
| 24043 | 43.5 | 47.0 | 48.7 | 51.6 | 53.4 | 58.0 | 59.5 | 63.1 |
| 24510 | 46.3 | 49.9 | 51.6 | 54.6 | 56.4 | 61.1 | 62.6 | 66.3 |
| 25001 | 42.1 | 44.7 | 46.0 | 48.7 | 50.5 | 54.8 | 56.1 | 58.8 |
| 25003 | 34.6 | 38.4 | 40.1 | 42.9 | 44.8 | 50.1 | 51.9 | 55.4 |
| 25005 | 41.7 | 44.7 | 46.1 | 49.0 | 50.8 | 55.5 | 57.0 | 59.8 |
| 25009 | 39.7 | 43.0 | 44.5 | 47.4 | 49.2 | 54.3 | 55.8 | 58.8 |
| 25013 | 38.2 | 42.4 | 44.0 | 47.0 | 48.9 | 54.1 | 55.7 | 58.9 |
| 25015 | 37.1 | 41.3 | 42.9 | 45.9 | 47.8 | 53.0 | 54.6 | 57.8 |
| 25017 | 39.5 | 43.0 | 44.5 | 47.5 | 49.4 | 54.6 | 56.1 | 59.2 |
| 25021 | 40.5 | 43.8 | 45.3 | 48.2 | 50.0 | 55.1 | 56.6 | 59.5 |
| 25023 | 41.1 | 44.1 | 45.6 | 48.5 | 50.3 | 55.0 | 56.5 | 59.2 |
| 25025 | 40.9 | 44.4 | 45.9 | 48.9 | 50.8 | 55.8 | 57.2 | 60.3 |
| 25027 | 37.6 | 41.2 | 42.8 | 45.7 | 47.6 | 52.8 | 54.5 | 57.7 |
| 26017 | 35.6 | 40.2 | 42.0 | 45.1 | 47.0 | 52.5 | 54.4 | 59.3 |
| 26021 | 38.1 | 42.3 | 43.9 | 46.7 | 48.7 | 53.8 | 55.5 | 59.7 |
| 26025 | 36.6 | 41.3 | 42.9 | 46.0 | 47.9 | 53.1 | 54.9 | 59.1 |
| 26049 | 35.6 | 40.2 | 41.9 | 45.0 | 47.0 | 52.3 | 54.0 | 58.9 |
| 26065 | 35.7 | 40.4 | 42.1 | 45.0 | 46.9 | 52.3 | 54.1 | 58.6 |
| 26075 | 36.2 | 41.0 | 42.8 | 45.6 | 47.6 | 52.8 | 54.5 | 59.1 |
| 26077 | 37.4 | 41.8 | 43.4 | 46.3 | 48.3 | 53.7 | 55.4 | 59.8 |
| 26081 | 35.5 | 40.3 | 42.1 | 45.0 | 47.0 | 52.3 | 54.0 | 58.8 |
| 26093 | 36.1 | 40.7 | 42.5 | 45.4 | 47.4 | 52.9 | 54.6 | 59.3 |
| 26099 | 38.0 | 42.6 | 44.3 | 47.3 | 49.3 | 54.8 | 56.5 | 61.0 |
| 26115 | 38.9 | 43.2 | 44.7 | 47.8 | 49.7 | 55.3 | 57.0 | 60.2 |
| 26121 | 36.1 | 40.9 | 42.6 | 45.5 | 47.3 | 52.4 | 54.1 | 58.2 |
| 26125 | 36.8 | 41.4 | 43.1 | 46.1 | 48.1 | 53.6 | 55.3 | 60.1 |
| 26139 | 36.8 | 41.7 | 43.4 | 46.2 | 48.1 | 53.3 | 55.0 | 59.4 |
| 26145 | 35.6 | 40.2 | 42.1 | 45.1 | 47.1 | 52.6 | 54.4 | 59.4 |
| 26147 | 36.5 | 40.9 | 42.7 | 45.7 | 47.7 | 53.1 | 54.7 | 59.0 |
| 26161 | 37.0 | 41.6 | 43.2 | 46.1 | 48.0 | 53.6 | 55.3 | 59.9 |
| 26163 | 38.1 | 42.8 | 44.6 | 47.6 | 49.6 | 54.9 | 56.6 | 61.4 |
| 27003 | 30.7 | 36.1 | 38.3 | 41.7 | 44.0 | 51.0 | 52.8 | 57.4 |
| 27037 | 31.3 | 36.4 | 38.8 | 42.2 | 44.4 | 51.5 | 53.4 | 58.3 |
| 27053 | 31.4 | 36.7 | 39.0 | 42.4 | 44.8 | 51.9 | 53.7 | 58.4 |
| 27123 | 31.6 | 37.1 | 39.2 | 42.8 | 45.1 | 52.1 | 53.9 | 58.8 |
| 27137 | 24.3 | 30.9 | 32.9 | 36.3 | 38.4 | 45.1 | 47.0 | 51.8 |
| 27145 | 28.9 | 34.0 | 36.5 | 39.8 | 42.1 | 49.5 | 51.4 | 56.1 |

|       |      |      |      |      |      |      |      |      |
|-------|------|------|------|------|------|------|------|------|
| 27163 | 31.1 | 36.4 | 38.7 | 42.1 | 44.3 | 51.4 | 53.2 | 57.9 |
| 28047 | 60.2 | 62.7 | 63.7 | 65.9 | 67.3 | 70.8 | 71.8 | 75.3 |
| 28049 | 56.9 | 59.5 | 60.7 | 63.3 | 64.9 | 68.8 | 69.9 | 73.3 |
| 28059 | 59.4 | 62.1 | 63.2 | 65.5 | 66.8 | 70.2 | 71.3 | 74.6 |
| 29019 | 44.4 | 47.7 | 49.3 | 52.3 | 54.3 | 59.8 | 61.5 | 65.4 |
| 29047 | 43.8 | 46.9 | 48.7 | 51.8 | 53.8 | 59.4 | 61.0 | 65.2 |
| 29077 | 45.6 | 48.8 | 50.2 | 53.0 | 54.9 | 59.9 | 61.5 | 65.7 |
| 29095 | 44.6 | 47.8 | 49.5 | 52.7 | 54.6 | 60.1 | 61.7 | 65.9 |
| 29099 | 45.1 | 48.9 | 50.5 | 53.4 | 55.2 | 60.6 | 62.2 | 66.3 |
| 29183 | 44.2 | 48.4 | 50.0 | 52.9 | 54.9 | 60.3 | 61.9 | 65.9 |
| 29189 | 45.2 | 49.1 | 50.8 | 53.8 | 55.7 | 61.1 | 62.7 | 66.8 |
| 29510 | 45.7 | 49.4 | 51.0 | 54.1 | 56.0 | 61.4 | 63.0 | 66.9 |
| 30111 | 36.4 | 40.1 | 41.8 | 45.2 | 47.1 | 52.2 | 53.6 | 57.2 |
| 31055 | 39.0 | 42.9 | 44.8 | 48.2 | 50.3 | 56.4 | 58.2 | 62.7 |
| 31109 | 39.7 | 43.8 | 45.5 | 48.8 | 51.1 | 57.1 | 58.8 | 63.1 |
| 32003 | 57.6 | 61.6 | 63.0 | 66.2 | 68.1 | 72.8 | 74.3 | 78.0 |
| 32031 | 43.0 | 46.3 | 47.8 | 50.6 | 52.2 | 56.1 | 57.3 | 61.9 |
| 33011 | 36.8 | 40.5 | 42.1 | 45.1 | 46.9 | 52.3 | 53.9 | 57.3 |
| 33015 | 37.4 | 40.8 | 42.4 | 45.2 | 47.1 | 52.6 | 54.2 | 57.5 |
| 34001 | 44.9 | 48.1 | 49.6 | 52.5 | 54.2 | 58.8 | 60.3 | 62.9 |
| 34003 | 42.9 | 46.8 | 48.2 | 51.1 | 53.0 | 58.0 | 59.6 | 62.6 |
| 34005 | 44.8 | 48.2 | 49.6 | 52.5 | 54.2 | 59.1 | 60.6 | 63.2 |
| 34007 | 45.7 | 49.0 | 50.4 | 53.4 | 55.1 | 60.0 | 61.5 | 64.2 |
| 34011 | 45.2 | 48.4 | 49.8 | 52.7 | 54.4 | 59.2 | 60.6 | 63.4 |
| 34013 | 42.7 | 46.6 | 48.2 | 51.2 | 53.0 | 57.9 | 59.4 | 62.7 |
| 34015 | 45.5 | 48.7 | 50.1 | 53.1 | 54.8 | 59.7 | 61.1 | 63.9 |
| 34017 | 44.2 | 48.1 | 49.7 | 52.8 | 54.6 | 59.5 | 61.0 | 64.1 |
| 34021 | 43.4 | 47.0 | 48.4 | 51.3 | 53.2 | 57.9 | 59.4 | 62.2 |
| 34023 | 42.9 | 46.9 | 48.5 | 51.5 | 53.3 | 58.1 | 59.6 | 62.5 |
| 34025 | 43.8 | 47.5 | 48.8 | 51.7 | 53.4 | 58.1 | 59.5 | 62.1 |
| 34027 | 40.1 | 43.8 | 45.4 | 48.2 | 49.9 | 55.0 | 56.6 | 59.8 |
| 34029 | 44.4 | 47.5 | 49.0 | 51.8 | 53.5 | 58.2 | 59.6 | 62.4 |
| 34031 | 41.9 | 45.8 | 47.3 | 50.3 | 52.1 | 57.1 | 58.7 | 61.7 |
| 34035 | 41.8 | 45.5 | 47.1 | 49.9 | 51.7 | 56.7 | 58.1 | 61.1 |
| 34037 | 38.5 | 42.2 | 43.7 | 46.6 | 48.4 | 53.5 | 55.2 | 58.0 |
| 34039 | 43.0 | 47.1 | 48.7 | 51.6 | 53.5 | 58.4 | 59.8 | 63.2 |
| 35001 | 46.7 | 49.1 | 50.4 | 53.2 | 55.1 | 59.9 | 61.1 | 64.6 |
| 36001 | 37.0 | 41.1 | 42.8 | 45.8 | 47.7 | 53.3 | 55.0 | 58.2 |
| 36005 | 44.1 | 48.2 | 49.8 | 52.8 | 54.7 | 59.5 | 60.9 | 64.0 |
| 36007 | 35.5 | 39.9 | 41.4 | 44.4 | 46.3 | 51.4 | 53.0 | 56.5 |
| 36013 | 36.1 | 40.5 | 42.2 | 45.0 | 46.8 | 51.9 | 53.5 | 57.1 |
| 36027 | 38.4 | 42.8 | 44.2 | 47.2 | 49.1 | 54.3 | 55.8 | 59.3 |
| 36029 | 36.6 | 40.9 | 42.5 | 45.4 | 47.3 | 52.5 | 54.2 | 58.1 |
| 36047 | 44.0 | 48.2 | 49.8 | 52.9 | 54.7 | 59.4 | 60.7 | 63.8 |
| 36055 | 37.2 | 41.6 | 43.2 | 46.1 | 48.0 | 53.2 | 54.9 | 58.4 |
| 36059 | 43.0 | 47.0 | 48.5 | 51.4 | 53.2 | 57.9 | 59.3 | 62.4 |
| 36061 | 44.3 | 48.3 | 49.9 | 53.0 | 54.8 | 59.7 | 61.1 | 64.3 |
| 36063 | 37.3 | 41.5 | 43.1 | 46.1 | 48.0 | 53.3 | 55.0 | 59.0 |

|       |      |      |      |      |      |      |      |      |
|-------|------|------|------|------|------|------|------|------|
| 36065 | 34.7 | 39.3 | 41.1 | 44.1 | 46.1 | 51.8 | 53.5 | 58.1 |
| 36067 | 35.7 | 40.6 | 42.2 | 45.2 | 47.1 | 52.6 | 54.3 | 58.3 |
| 36071 | 39.0 | 43.2 | 44.7 | 47.7 | 49.6 | 54.7 | 56.2 | 59.4 |
| 36075 | 35.5 | 40.0 | 41.7 | 44.7 | 46.5 | 51.9 | 53.7 | 57.4 |
| 36081 | 44.0 | 48.1 | 49.7 | 52.7 | 54.6 | 59.3 | 60.6 | 63.7 |
| 36083 | 36.4 | 40.7 | 42.3 | 45.2 | 47.1 | 52.7 | 54.4 | 57.8 |
| 36085 | 43.8 | 48.1 | 49.7 | 52.6 | 54.4 | 59.2 | 60.6 | 63.8 |
| 36087 | 41.1 | 45.2 | 46.7 | 49.7 | 51.5 | 56.4 | 57.9 | 60.8 |
| 36089 | 31.8 | 36.3 | 38.1 | 41.2 | 43.3 | 49.6 | 51.5 | 55.6 |
| 36091 | 36.1 | 40.3 | 41.9 | 44.9 | 46.8 | 52.5 | 54.2 | 57.8 |
| 36093 | 36.7 | 40.7 | 42.2 | 45.3 | 47.2 | 52.9 | 54.5 | 58.0 |
| 36103 | 42.2 | 46.1 | 47.6 | 50.5 | 52.3 | 57.1 | 58.4 | 61.7 |
| 36111 | 37.9 | 42.3 | 43.8 | 46.8 | 48.7 | 53.8 | 55.4 | 58.6 |
| 36119 | 42.3 | 46.3 | 47.8 | 50.8 | 52.6 | 57.6 | 59.0 | 62.1 |
| 37021 | 46.0 | 49.4 | 50.7 | 53.0 | 54.6 | 58.5 | 59.8 | 63.0 |
| 37035 | 49.1 | 52.8 | 54.1 | 56.6 | 58.2 | 62.4 | 63.7 | 67.0 |
| 37051 | 52.9 | 56.3 | 57.6 | 60.3 | 61.9 | 65.9 | 67.1 | 70.3 |
| 37057 | 49.2 | 52.9 | 54.2 | 56.9 | 58.6 | 62.8 | 64.1 | 66.8 |
| 37063 | 50.1 | 53.7 | 54.9 | 57.7 | 59.4 | 63.7 | 64.9 | 67.6 |
| 37067 | 48.8 | 52.3 | 53.6 | 56.4 | 58.0 | 62.2 | 63.5 | 66.2 |
| 37071 | 51.0 | 54.6 | 55.8 | 58.5 | 60.0 | 64.1 | 65.2 | 68.9 |
| 37081 | 49.4 | 52.8 | 54.1 | 56.8 | 58.5 | 62.8 | 64.1 | 66.9 |
| 37119 | 51.4 | 54.9 | 56.0 | 58.6 | 60.2 | 64.5 | 65.6 | 68.9 |
| 37129 | 55.4 | 58.3 | 59.4 | 61.8 | 63.3 | 67.1 | 68.2 | 71.0 |
| 37133 | 54.3 | 57.4 | 58.6 | 60.9 | 62.3 | 66.3 | 67.4 | 70.5 |
| 37155 | 54.1 | 56.8 | 58.1 | 60.7 | 62.2 | 66.2 | 67.3 | 70.3 |
| 37183 | 50.9 | 54.3 | 55.5 | 58.2 | 59.8 | 64.0 | 65.1 | 67.9 |
| 39003 | 39.6 | 44.3 | 45.9 | 48.9 | 50.8 | 56.3 | 58.0 | 61.9 |
| 39017 | 42.4 | 46.9 | 48.3 | 51.2 | 53.1 | 58.2 | 59.7 | 63.3 |
| 39023 | 40.0 | 44.8 | 46.3 | 49.3 | 51.3 | 56.3 | 57.9 | 61.5 |
| 39025 | 43.4 | 47.8 | 49.2 | 52.0 | 53.8 | 59.0 | 60.5 | 63.8 |
| 39029 | 39.4 | 43.4 | 45.0 | 47.8 | 49.6 | 54.6 | 56.0 | 59.7 |
| 39035 | 39.8 | 43.9 | 45.6 | 48.4 | 50.3 | 55.4 | 57.0 | 60.8 |
| 39049 | 41.4 | 45.8 | 47.5 | 50.4 | 52.3 | 57.4 | 59.1 | 62.6 |
| 39057 | 41.1 | 45.7 | 47.2 | 50.2 | 52.2 | 57.4 | 59.0 | 62.2 |
| 39061 | 43.5 | 47.9 | 49.4 | 52.2 | 54.1 | 59.2 | 60.7 | 64.2 |
| 39085 | 40.0 | 44.0 | 45.7 | 48.4 | 50.3 | 55.3 | 56.9 | 60.8 |
| 39089 | 39.8 | 44.3 | 45.9 | 48.7 | 50.6 | 55.6 | 57.1 | 61.1 |
| 39093 | 39.3 | 43.8 | 45.5 | 48.4 | 50.3 | 55.4 | 57.1 | 60.9 |
| 39095 | 39.1 | 43.7 | 45.3 | 48.4 | 50.4 | 55.7 | 57.4 | 61.5 |
| 39099 | 38.8 | 42.7 | 44.4 | 47.2 | 49.1 | 54.0 | 55.7 | 59.2 |
| 39103 | 38.7 | 43.2 | 44.7 | 47.5 | 49.4 | 54.6 | 56.3 | 60.0 |
| 39113 | 41.4 | 46.1 | 47.7 | 50.6 | 52.6 | 57.8 | 59.5 | 63.0 |
| 39133 | 39.0 | 42.9 | 44.6 | 47.6 | 49.4 | 54.3 | 55.9 | 59.6 |
| 39139 | 38.0 | 42.5 | 44.1 | 47.0 | 48.9 | 54.0 | 55.7 | 59.6 |
| 39151 | 39.4 | 43.7 | 45.3 | 48.2 | 50.1 | 55.2 | 56.7 | 60.6 |
| 39153 | 39.2 | 43.5 | 45.1 | 48.1 | 50.0 | 55.0 | 56.6 | 60.3 |
| 39155 | 38.8 | 42.8 | 44.5 | 47.5 | 49.2 | 54.1 | 55.8 | 59.4 |

|       |      |      |      |      |      |      |      |      |
|-------|------|------|------|------|------|------|------|------|
| 39173 | 39.1 | 43.3 | 44.9 | 47.9 | 50.0 | 55.3 | 57.1 | 61.1 |
| 40027 | 51.3 | 54.2 | 55.5 | 58.7 | 60.5 | 65.4 | 66.8 | 71.5 |
| 40031 | 52.4 | 55.4 | 56.6 | 59.7 | 61.5 | 66.2 | 67.6 | 72.8 |
| 40109 | 50.9 | 54.0 | 55.3 | 58.4 | 60.3 | 65.2 | 66.6 | 71.5 |
| 40143 | 49.8 | 53.2 | 54.6 | 57.7 | 59.5 | 64.4 | 66.0 | 70.6 |
| 41005 | 47.0 | 49.3 | 50.1 | 52.2 | 53.3 | 56.1 | 56.9 | 60.2 |
| 41029 | 45.6 | 48.8 | 49.8 | 52.4 | 53.7 | 56.9 | 57.7 | 61.7 |
| 41039 | 46.6 | 49.0 | 49.7 | 51.9 | 52.9 | 55.6 | 56.3 | 59.7 |
| 41047 | 46.8 | 49.1 | 49.9 | 52.1 | 53.2 | 55.9 | 56.6 | 60.1 |
| 41051 | 47.2 | 49.4 | 50.2 | 52.4 | 53.5 | 56.3 | 57.1 | 60.3 |
| 41067 | 46.7 | 49.0 | 49.9 | 52.0 | 53.2 | 56.0 | 56.8 | 60.1 |
| 42003 | 41.9 | 45.4 | 47.0 | 49.8 | 51.6 | 56.5 | 58.0 | 61.6 |
| 42007 | 41.3 | 44.8 | 46.4 | 49.1 | 50.9 | 55.8 | 57.2 | 60.8 |
| 42011 | 41.7 | 45.4 | 47.0 | 49.9 | 51.8 | 56.8 | 58.2 | 61.6 |
| 42013 | 39.0 | 42.8 | 44.6 | 47.4 | 49.3 | 54.2 | 55.7 | 59.6 |
| 42017 | 43.1 | 46.8 | 48.2 | 51.1 | 53.0 | 57.8 | 59.3 | 62.0 |
| 42019 | 39.5 | 43.1 | 44.8 | 47.6 | 49.4 | 54.2 | 55.8 | 59.3 |
| 42021 | 38.4 | 41.9 | 43.5 | 46.2 | 48.0 | 52.9 | 54.4 | 57.9 |
| 42027 | 38.9 | 42.5 | 44.1 | 47.0 | 48.8 | 53.9 | 55.5 | 59.0 |
| 42029 | 42.5 | 46.1 | 47.5 | 50.4 | 52.2 | 57.1 | 58.6 | 61.4 |
| 42041 | 42.1 | 45.8 | 47.4 | 50.3 | 52.2 | 57.2 | 58.6 | 62.1 |
| 42043 | 41.9 | 45.6 | 47.2 | 50.2 | 52.1 | 57.1 | 58.5 | 62.1 |
| 42045 | 45.0 | 48.5 | 49.9 | 53.0 | 54.8 | 59.6 | 61.1 | 64.0 |
| 42049 | 37.9 | 42.1 | 43.7 | 46.6 | 48.5 | 53.5 | 55.1 | 59.2 |
| 42051 | 41.1 | 45.0 | 46.5 | 49.3 | 51.1 | 55.8 | 57.2 | 60.5 |
| 42055 | 42.4 | 45.9 | 47.6 | 50.3 | 52.2 | 57.0 | 58.5 | 62.3 |
| 42069 | 37.5 | 41.3 | 42.8 | 45.7 | 47.6 | 52.7 | 54.3 | 57.8 |
| 42071 | 42.6 | 46.3 | 47.8 | 50.8 | 52.6 | 57.4 | 58.9 | 62.3 |
| 42075 | 41.8 | 45.5 | 47.1 | 50.0 | 51.8 | 56.8 | 58.2 | 61.8 |
| 42077 | 41.1 | 44.8 | 46.3 | 49.2 | 51.1 | 56.0 | 57.6 | 60.8 |
| 42079 | 38.5 | 42.0 | 43.6 | 46.5 | 48.4 | 53.5 | 55.1 | 58.8 |
| 42081 | 38.4 | 42.5 | 44.0 | 47.0 | 48.7 | 53.9 | 55.4 | 58.7 |
| 42085 | 38.4 | 42.4 | 44.1 | 47.0 | 48.7 | 53.7 | 55.3 | 58.9 |
| 42091 | 43.2 | 46.9 | 48.2 | 51.2 | 53.0 | 57.9 | 59.4 | 62.2 |
| 42095 | 40.7 | 44.4 | 46.0 | 48.9 | 50.8 | 55.8 | 57.3 | 60.7 |
| 42101 | 45.3 | 48.8 | 50.2 | 53.4 | 55.2 | 60.0 | 61.4 | 64.0 |
| 42107 | 38.5 | 42.2 | 43.9 | 46.8 | 48.6 | 53.6 | 55.1 | 58.7 |
| 42125 | 40.9 | 44.7 | 46.3 | 49.1 | 50.9 | 55.6 | 57.2 | 60.7 |
| 42129 | 41.1 | 44.6 | 46.1 | 48.9 | 50.7 | 55.5 | 56.9 | 60.3 |
| 42133 | 42.4 | 46.0 | 47.6 | 50.4 | 52.2 | 57.0 | 58.5 | 61.8 |
| 44003 | 41.4 | 44.6 | 46.1 | 49.0 | 50.8 | 55.5 | 57.0 | 59.9 |
| 44007 | 41.1 | 44.3 | 45.8 | 48.8 | 50.6 | 55.4 | 56.9 | 59.8 |
| 45003 | 55.1 | 58.2 | 59.4 | 61.8 | 63.4 | 67.4 | 68.7 | 71.8 |
| 45007 | 52.5 | 55.8 | 57.0 | 59.5 | 61.1 | 65.2 | 66.4 | 69.5 |
| 45019 | 58.2 | 60.8 | 62.0 | 64.3 | 65.7 | 69.4 | 70.6 | 73.7 |
| 45041 | 55.3 | 58.0 | 59.3 | 61.8 | 63.4 | 67.4 | 68.6 | 71.4 |
| 45045 | 51.8 | 55.0 | 56.3 | 58.9 | 60.4 | 64.5 | 65.8 | 68.7 |
| 45051 | 56.3 | 58.9 | 60.0 | 62.3 | 63.8 | 67.7 | 68.8 | 71.6 |



|       |      |      |      |      |      |      |      |      |
|-------|------|------|------|------|------|------|------|------|
| 45063 | 54.4 | 57.4 | 58.7 | 61.2 | 62.8 | 67.0 | 68.2 | 71.2 |
| 45079 | 54.9 | 57.7 | 59.0 | 61.6 | 63.2 | 67.4 | 68.6 | 71.3 |
| 45083 | 51.6 | 54.6 | 55.7 | 58.4 | 60.0 | 64.2 | 65.3 | 68.1 |
| 45091 | 51.5 | 54.8 | 56.0 | 58.6 | 60.2 | 64.4 | 65.6 | 68.7 |
| 46099 | 30.9 | 36.6 | 39.0 | 42.5 | 44.8 | 51.5 | 53.5 | 57.7 |
| 47037 | 48.3 | 52.2 | 53.7 | 56.5 | 58.3 | 62.8 | 64.2 | 67.9 |
| 47065 | 49.2 | 53.4 | 54.8 | 57.5 | 59.1 | 63.5 | 65.0 | 68.5 |
| 47093 | 47.5 | 51.7 | 53.0 | 55.7 | 57.3 | 61.9 | 63.2 | 66.5 |
| 47157 | 52.2 | 55.4 | 56.8 | 59.6 | 61.3 | 66.0 | 67.3 | 71.5 |
| 47163 | 46.4 | 50.4 | 51.7 | 54.3 | 55.9 | 60.3 | 61.6 | 64.8 |
| 48027 | 58.7 | 61.1 | 62.2 | 64.8 | 66.4 | 70.4 | 71.7 | 75.3 |
| 48029 | 61.7 | 64.5 | 65.5 | 67.7 | 69.2 | 73.0 | 74.1 | 76.9 |
| 48039 | 63.5 | 65.6 | 66.4 | 68.6 | 69.8 | 73.3 | 74.3 | 77.2 |
| 48061 | 68.6 | 70.5 | 71.6 | 73.2 | 74.2 | 77.2 | 78.1 | 80.3 |
| 48085 | 56.3 | 58.8 | 60.0 | 62.9 | 64.6 | 69.2 | 70.5 | 75.1 |
| 48113 | 57.1 | 59.8 | 60.9 | 63.8 | 65.5 | 70.0 | 71.2 | 76.0 |
| 48121 | 56.4 | 59.1 | 60.3 | 63.2 | 64.9 | 69.6 | 70.9 | 75.5 |
| 48135 | 56.0 | 58.9 | 60.0 | 62.7 | 64.5 | 69.0 | 70.4 | 74.1 |
| 48141 | 56.3 | 58.8 | 60.0 | 62.6 | 64.3 | 69.0 | 70.2 | 73.0 |
| 48157 | 63.2 | 65.5 | 66.4 | 68.7 | 69.9 | 73.6 | 74.5 | 77.8 |
| 48167 | 63.0 | 65.4 | 66.3 | 68.5 | 69.7 | 73.1 | 74.1 | 77.1 |
| 48201 | 63.1 | 65.3 | 66.2 | 68.5 | 69.8 | 73.4 | 74.4 | 77.5 |
| 48215 | 68.7 | 70.9 | 71.9 | 73.7 | 74.8 | 78.0 | 79.0 | 81.3 |
| 48245 | 61.3 | 63.9 | 64.7 | 67.1 | 68.4 | 72.0 | 73.1 | 76.3 |
| 48303 | 52.0 | 54.5 | 55.6 | 58.4 | 60.2 | 64.9 | 66.2 | 69.8 |
| 48309 | 58.4 | 60.9 | 61.9 | 64.8 | 66.4 | 70.6 | 71.8 | 75.7 |
| 48339 | 61.6 | 63.8 | 64.8 | 67.1 | 68.4 | 72.2 | 73.2 | 76.4 |
| 48355 | 66.3 | 68.3 | 69.2 | 71.1 | 72.2 | 75.5 | 76.5 | 79.1 |
| 48423 | 57.6 | 60.1 | 61.1 | 63.6 | 65.3 | 69.5 | 70.7 | 74.4 |
| 48439 | 57.2 | 59.7 | 60.9 | 63.7 | 65.4 | 70.0 | 71.3 | 75.9 |
| 48441 | 55.6 | 58.7 | 59.8 | 62.6 | 64.3 | 68.8 | 70.1 | 74.7 |
| 48453 | 60.2 | 62.7 | 63.8 | 66.3 | 67.8 | 71.8 | 72.9 | 76.1 |
| 48485 | 54.4 | 57.2 | 58.5 | 61.6 | 63.4 | 68.2 | 69.6 | 73.6 |
| 49011 | 41.0 | 44.3 | 45.6 | 49.0 | 50.9 | 56.2 | 57.8 | 61.9 |
| 49035 | 42.1 | 45.4 | 46.8 | 50.2 | 52.1 | 57.1 | 58.5 | 63.1 |
| 49049 | 41.3 | 44.4 | 45.8 | 49.0 | 50.9 | 56.0 | 57.4 | 61.3 |
| 49057 | 39.6 | 43.2 | 44.5 | 47.9 | 49.8 | 55.4 | 56.9 | 60.9 |
| 50007 | 32.9 | 37.1 | 38.9 | 41.9 | 43.9 | 50.3 | 52.1 | 56.2 |
| 51013 | 46.9 | 50.3 | 52.0 | 54.8 | 56.7 | 61.4 | 62.7 | 66.0 |
| 51041 | 48.0 | 51.5 | 52.9 | 55.6 | 57.3 | 61.9 | 63.3 | 66.5 |
| 51059 | 46.1 | 49.5 | 51.1 | 53.8 | 55.7 | 60.5 | 61.8 | 65.4 |
| 51087 | 47.9 | 51.4 | 52.8 | 55.6 | 57.4 | 61.9 | 63.3 | 66.4 |
| 51153 | 46.2 | 49.5 | 51.1 | 53.8 | 55.6 | 60.3 | 61.7 | 65.1 |
| 51510 | 47.2 | 50.8 | 52.4 | 55.3 | 57.1 | 61.8 | 63.2 | 66.6 |
| 51550 | 51.3 | 54.7 | 55.9 | 58.7 | 60.2 | 64.4 | 65.6 | 69.2 |
| 51650 | 51.2 | 54.6 | 55.8 | 58.6 | 60.2 | 64.3 | 65.5 | 68.4 |
| 51700 | 50.9 | 54.5 | 55.7 | 58.4 | 60.1 | 64.3 | 65.5 | 68.4 |
| 51710 | 51.3 | 54.8 | 56.1 | 58.8 | 60.4 | 64.5 | 65.7 | 68.7 |

|       |      |      |      |      |      |      |      |      |
|-------|------|------|------|------|------|------|------|------|
| 51740 | 51.5 | 54.9 | 56.2 | 58.8 | 60.5 | 64.7 | 65.9 | 69.0 |
| 51760 | 48.0 | 51.5 | 53.0 | 55.9 | 57.6 | 62.1 | 63.5 | 66.5 |
| 51810 | 51.3 | 54.7 | 55.9 | 58.5 | 60.1 | 64.2 | 65.5 | 68.3 |
| 53005 | 43.8 | 47.9 | 49.1 | 51.9 | 53.6 | 58.0 | 59.2 | 62.2 |
| 53011 | 46.4 | 48.5 | 49.3 | 51.4 | 52.5 | 55.4 | 56.2 | 59.3 |
| 53033 | 46.6 | 48.4 | 49.2 | 51.2 | 52.3 | 54.9 | 55.8 | 58.1 |
| 53035 | 45.8 | 47.8 | 48.6 | 50.6 | 51.7 | 54.3 | 55.1 | 57.5 |
| 53053 | 45.4 | 47.5 | 48.3 | 50.4 | 51.4 | 54.0 | 54.8 | 57.5 |
| 53061 | 45.9 | 47.5 | 48.3 | 50.1 | 51.2 | 53.8 | 54.7 | 56.5 |
| 53063 | 38.8 | 42.2 | 43.6 | 46.5 | 48.1 | 52.4 | 53.5 | 57.2 |
| 53067 | 44.6 | 46.7 | 47.6 | 49.6 | 50.6 | 53.1 | 54.1 | 56.8 |
| 53073 | 44.6 | 46.8 | 47.7 | 49.6 | 50.6 | 53.4 | 54.3 | 56.4 |
| 53077 | 41.2 | 45.0 | 46.2 | 49.0 | 50.8 | 55.0 | 56.2 | 59.5 |
| 54039 | 44.9 | 48.6 | 49.9 | 52.7 | 54.4 | 59.1 | 60.4 | 63.6 |
| 55009 | 31.6 | 37.0 | 38.9 | 41.9 | 44.0 | 50.1 | 52.0 | 56.9 |
| 55025 | 33.2 | 38.6 | 40.4 | 43.6 | 45.6 | 51.8 | 53.7 | 58.2 |
| 55059 | 35.6 | 40.4 | 42.3 | 45.3 | 47.3 | 52.8 | 54.7 | 59.0 |
| 55073 | 29.1 | 34.7 | 36.6 | 40.2 | 42.2 | 48.8 | 50.6 | 56.4 |
| 55079 | 35.5 | 40.6 | 42.5 | 45.7 | 47.7 | 53.2 | 55.1 | 59.8 |
| 55087 | 31.9 | 37.4 | 39.2 | 42.4 | 44.6 | 50.8 | 52.7 | 57.8 |
| 55101 | 35.3 | 40.2 | 42.0 | 45.1 | 47.1 | 52.6 | 54.5 | 58.9 |
| 55105 | 34.8 | 39.7 | 41.5 | 44.8 | 46.9 | 52.9 | 54.8 | 58.9 |
| 55117 | 33.2 | 38.4 | 40.3 | 43.4 | 45.4 | 50.8 | 52.6 | 57.1 |
| 55133 | 34.4 | 39.4 | 41.4 | 44.4 | 46.5 | 52.5 | 54.4 | 59.0 |
| 55139 | 32.3 | 37.8 | 39.6 | 42.9 | 45.0 | 51.3 | 53.2 | 58.2 |

**Supplemental Material, Table S2.** Summary statistics of average temperature during the entire pregnancy, overall and by geographic region and climate zone.

| <b>Subgroup</b>          | <b>Temperature Percentile</b> |                        |                        |                        |                        |                        |                        |                |
|--------------------------|-------------------------------|------------------------|------------------------|------------------------|------------------------|------------------------|------------------------|----------------|
|                          | <b>Minimum</b>                | <b>10<sup>th</sup></b> | <b>20<sup>th</sup></b> | <b>40<sup>th</sup></b> | <b>50<sup>th</sup></b> | <b>80<sup>th</sup></b> | <b>90<sup>th</sup></b> | <b>Maximum</b> |
| <b>Overall</b>           | 46.1                          | 49.7                   | 51.1                   | 53.8                   | 55.5                   | 60.0                   | 61.4                   | 64.9           |
| <b>Geographic region</b> |                               |                        |                        |                        |                        |                        |                        |                |
| Northeast                | 40.6                          | 44.4                   | 46.0                   | 48.9                   | 50.7                   | 55.8                   | 57.3                   | 60.6           |
| Southeast                | 55.6                          | 58.6                   | 59.8                   | 62.1                   | 63.6                   | 67.4                   | 68.6                   | 71.7           |
| Midwest                  | 38.1                          | 42.6                   | 44.4                   | 47.4                   | 49.4                   | 55.0                   | 56.7                   | 60.9           |
| Great Plains             | 55.2                          | 57.9                   | 59.2                   | 61.9                   | 63.5                   | 68.0                   | 69.3                   | 73.1           |
| Northwest                | 44.9                          | 47.5                   | 48.4                   | 50.7                   | 52.0                   | 55.1                   | 56.0                   | 59.0           |
| Southwest                | 50.8                          | 53.7                   | 54.8                   | 57.1                   | 58.4                   | 61.7                   | 62.8                   | 65.9           |
| <b>Climate zone</b>      |                               |                        |                        |                        |                        |                        |                        |                |
| Hot-Humid                | 62.3                          | 64.8                   | 65.7                   | 67.8                   | 69.0                   | 72.4                   | 73.4                   | 76.4           |
| Mixed-Humid              | 47.8                          | 51.3                   | 52.7                   | 55.5                   | 57.3                   | 61.9                   | 63.3                   | 66.7           |
| Hot-Dry/Mixed-Dry        | 55.5                          | 58.6                   | 59.8                   | 62.1                   | 63.4                   | 66.9                   | 68.0                   | 71.2           |
| Cold/Very Cold           | 38.2                          | 42.3                   | 44.0                   | 47.0                   | 48.9                   | 54.2                   | 55.9                   | 59.7           |
| Marine                   | 49.4                          | 51.8                   | 52.6                   | 54.3                   | 55.2                   | 57.4                   | 58.3                   | 60.9           |

**Supplemental Material, Table S3.** Pearson correlation between overall and trimester-specific temperature and fine particulate matter.

| Variable                                    | Temperature               |                           |                           | Entire Pregnancy | PM <sub>2.5</sub>         |                           |                           |
|---------------------------------------------|---------------------------|---------------------------|---------------------------|------------------|---------------------------|---------------------------|---------------------------|
|                                             | 1 <sup>st</sup> trimester | 2 <sup>nd</sup> trimester | 3 <sup>rd</sup> trimester |                  | 1 <sup>st</sup> trimester | 2 <sup>nd</sup> trimester | 3 <sup>rd</sup> trimester |
| Entire pregnancy temperature                | 0.49                      | 0.86                      | 0.48                      | -0.15            | -0.17                     | -0.08                     | -0.13                     |
| 1 <sup>st</sup> trimester temperature       |                           | 0.29                      | -0.41                     | -0.08            | 0.06                      | -0.04                     | -0.24                     |
| 2 <sup>nd</sup> trimester temperature       |                           |                           | 0.29                      | -0.06            | -0.13                     | 0.04                      | -0.05                     |
| 3 <sup>rd</sup> trimester temperature       |                           |                           |                           | -0.13            | -0.25                     | -0.14                     | 0.05                      |
| Entire pregnancy PM <sub>2.5</sub>          |                           |                           |                           |                  | 0.85                      | 0.89                      | 0.85                      |
| 1 <sup>st</sup> trimester PM <sub>2.5</sub> |                           |                           |                           |                  |                           | 0.66                      | 0.55                      |
| 2 <sup>nd</sup> trimester PM <sub>2.5</sub> |                           |                           |                           |                  |                           |                           | 0.67                      |

Abbreviations: PM<sub>2.5</sub>=fine particulate matter.

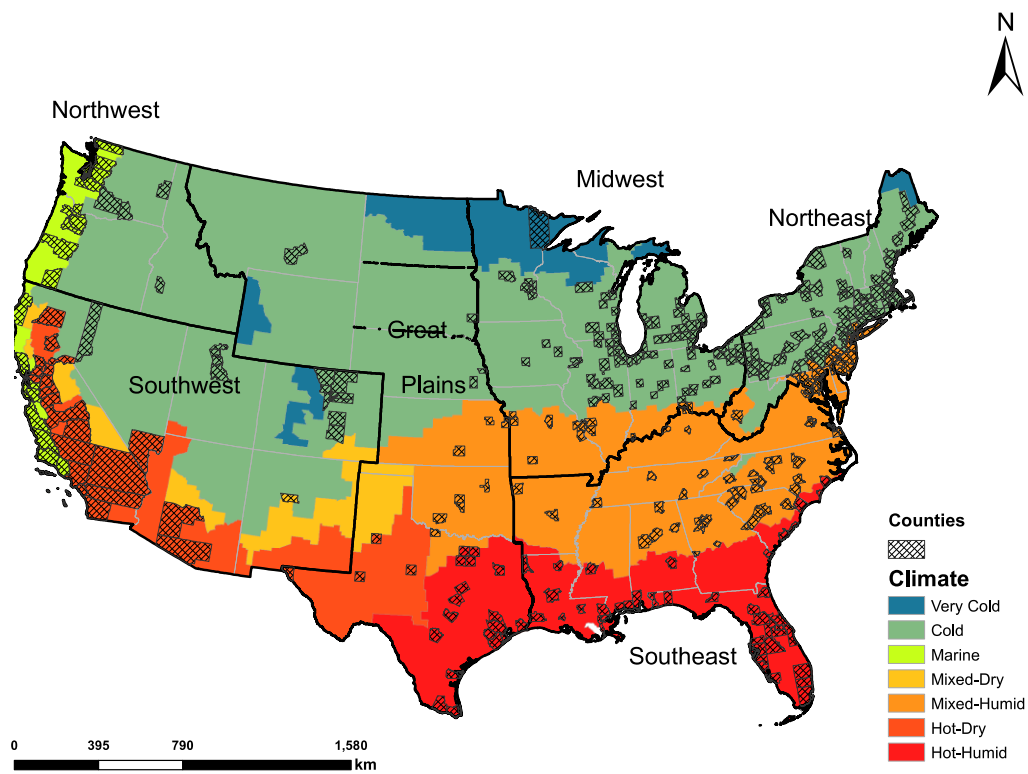

**Supplemental Material, Figure S1.** Location of the 403 US counties, 6 National Climate Assessment geographic regions, and 7 US Building America climate zones.

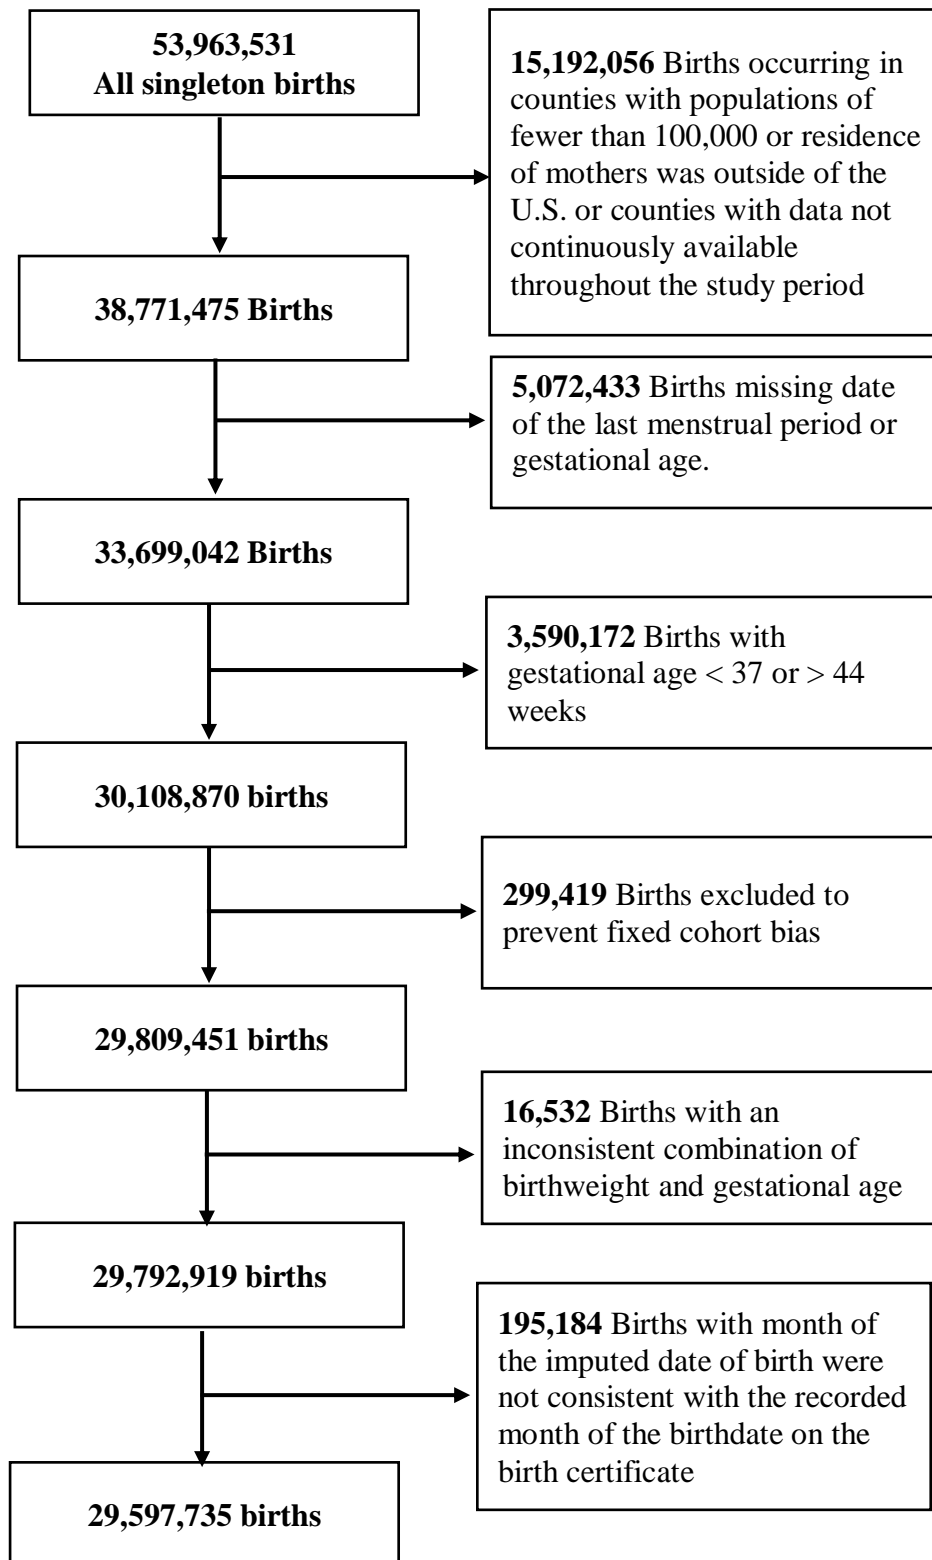

**Supplemental Material, Figure S2.** Flow diagram of birth exclusion in this study.

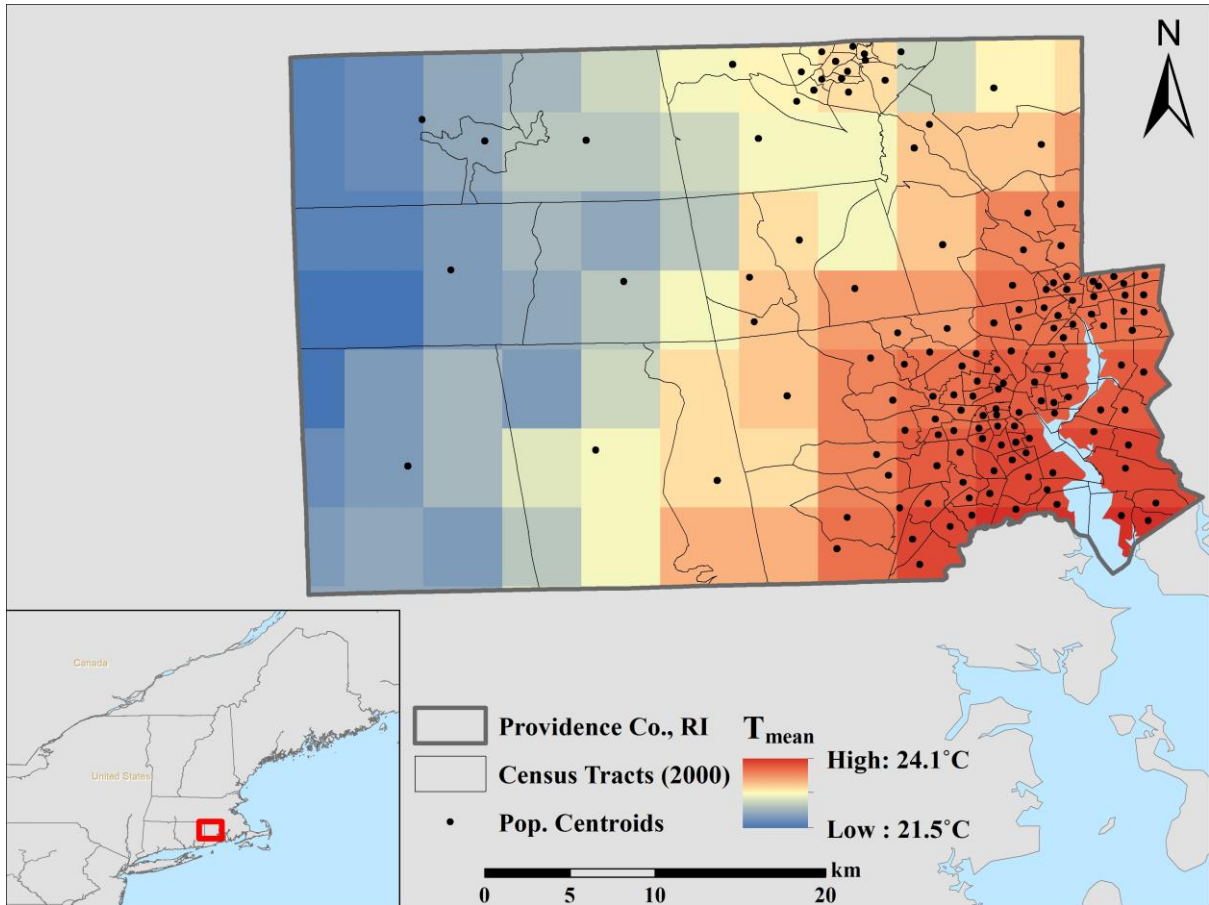

**Supplemental Material, Figure S3.** An illustration of how the gridded PRISM data intersect with census tracts in Providence county, RI.

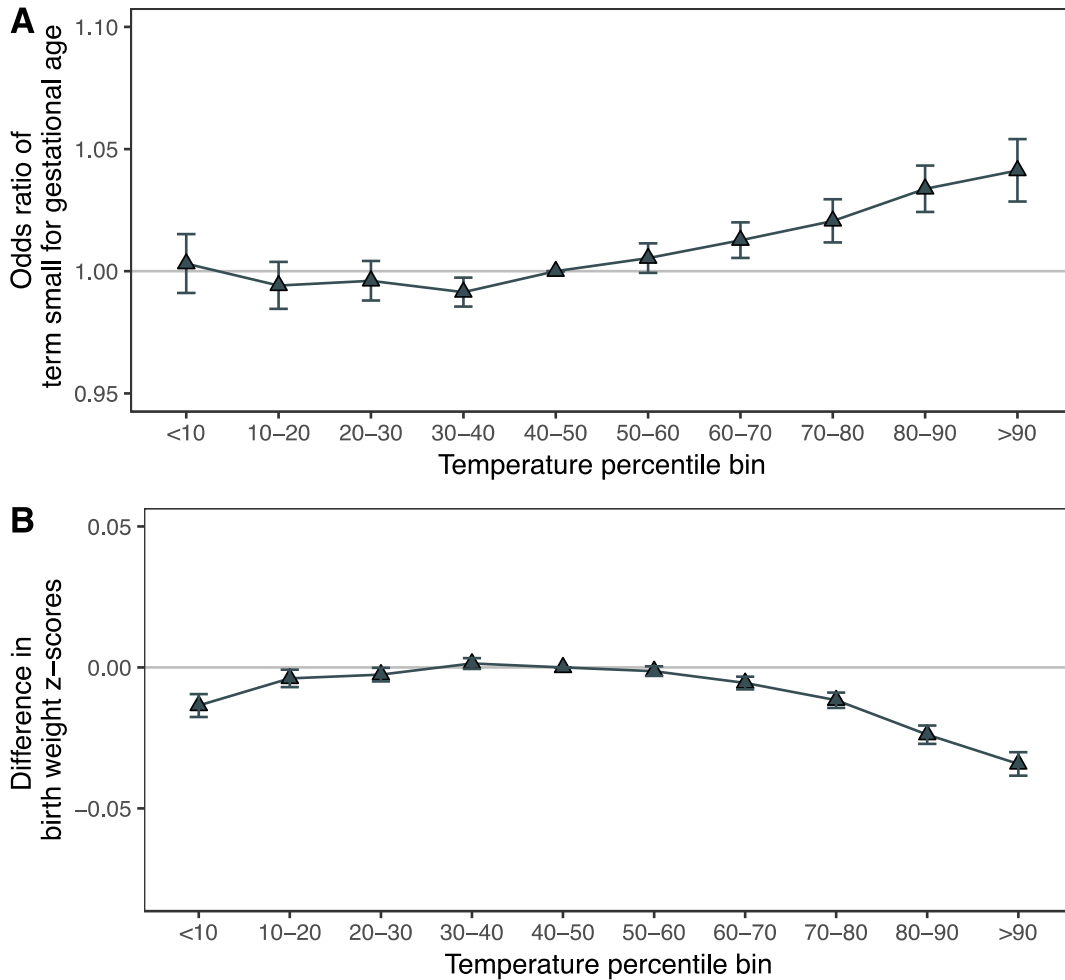

**Supplemental Material, Figure S4. Exposure-response curves for the associations between average temperatures during the entire pregnancy and small for gestational age (A) and birth weight z-score (B) among 31,921,046 births with gestational age ranging from 22 to 44 weeks in 403 US counties between 1989 and 2002.**

Models were adjusted for maternal age, race, marital status, years of education, smoking or drinking during pregnancy, parity, chronic hypertension, and year and month of conception.
