# Supplementary material
Source: PubMed Central journal article supplement (PMC6792370)
Supplement: ehp-127-067005-s002.pdf [file ehp-127-067005-s002.pdf]

**Note to readers with disabilities:** *EHP* strives to ensure that all journal content is accessible to all readers. However, some figures and Supplemental Material published in *EHP* articles may not conform to [508 standards](#) due to the complexity of the information being presented. If you need assistance accessing journal content, please contact [ehp508@niehs.nih.gov](mailto:ehp508@niehs.nih.gov). Our staff will work with you to assess and meet your accessibility needs within 3 working days.

### **Supplemental Material**

#### **Ambient Temperature and Markers of Fetal Growth: A Retrospective Observational Study of 29 Million U.S. Singleton Births**

Shengzhi Sun, Keith R. Spangler, Kate R. Weinberger, Jeff D. Yanosky, Joseph M. Braun, and Gregory A. Wellenius

#### **Table of Contents**

**Table S1.** Summary statistics of average temperature during the entire pregnancy by county.

**Table S2.** Summary statistics of average temperature during the entire pregnancy, overall and by geographic region and climate zone.

**Table S3.** Pearson correlation between overall and trimester-specific temperature and fine particulate matter.

**Figure S1.** Location of the 403 US counties, 6 National Climate Assessment geographic regions, and 7 US Building America climate zones.

**Figure S2.** Flow diagram of birth exclusion in this study.

**Figure S3.** An illustration of how the gridded PRISM data intersect with census tracts in Providence county, RI.

**Figure S4. Exposure-response curves for the associations between average temperatures during the entire pregnancy and small for gestational age (A) and birth weight z-score (B) among 31,921,046 births with gestational age ranging from 22 to 44 weeks in 403 US counties between 1989 and 2002.** Models were adjusted for maternal age, race, marital status, years of education, smoking or drinking during pregnancy, parity, chronic hypertension, and year and month of conception.
